# Supplementary material for: Effect of Niclosamide on Basal-like Breast Cancers
Source: Oxford University Press journal article supplement (doi:10.1158/1535-7163.mct-13-0555), 2014-02-20
Supplement: 15357163mct130555-sup-fig1.pdf [file 15357163mct130555-sup-fig1.pdf]

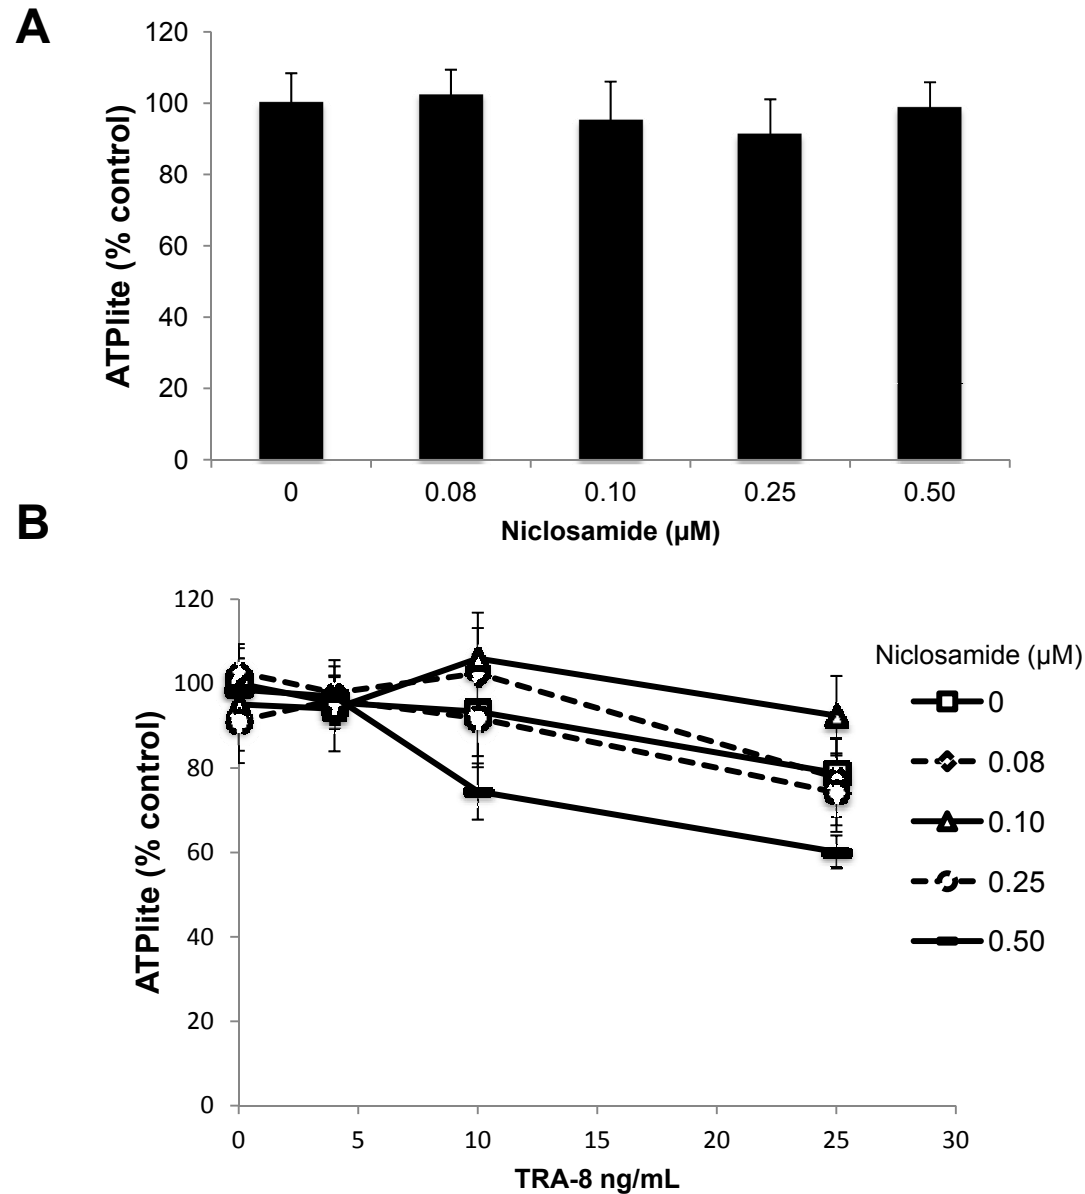

**Supplementary Figure S1. Sensitivity of MCF10A mammary epithelial cells to niclosamide and TRA-8 mediated cytotoxicity.** (A) Attached MCF10A cell line was treated for 48 hours with niclosamide (0.08, 0.1, 0.25 and 0.5  $\mu\text{M}$ ) and analyzed for cell viability using ATPlite assay. (B) Attached MCF10A cells were treated with niclosamide in combination with TRA-8 (4, 10 and 25 ng/ml) and analyzed for cell viability using ATPlite assay. All individual experiments were assayed in quadruplicate and values represent the mean and SE from three independent experiments.
