# Supplementary material for: Effect of Niclosamide on Basal-like Breast Cancers
Source: Oxford University Press journal article supplement (doi:10.1158/1535-7163.mct-13-0555), 2014-02-20
Supplement: 15357163mct130555-sup-fig2.pdf [file 15357163mct130555-sup-fig2.pdf]

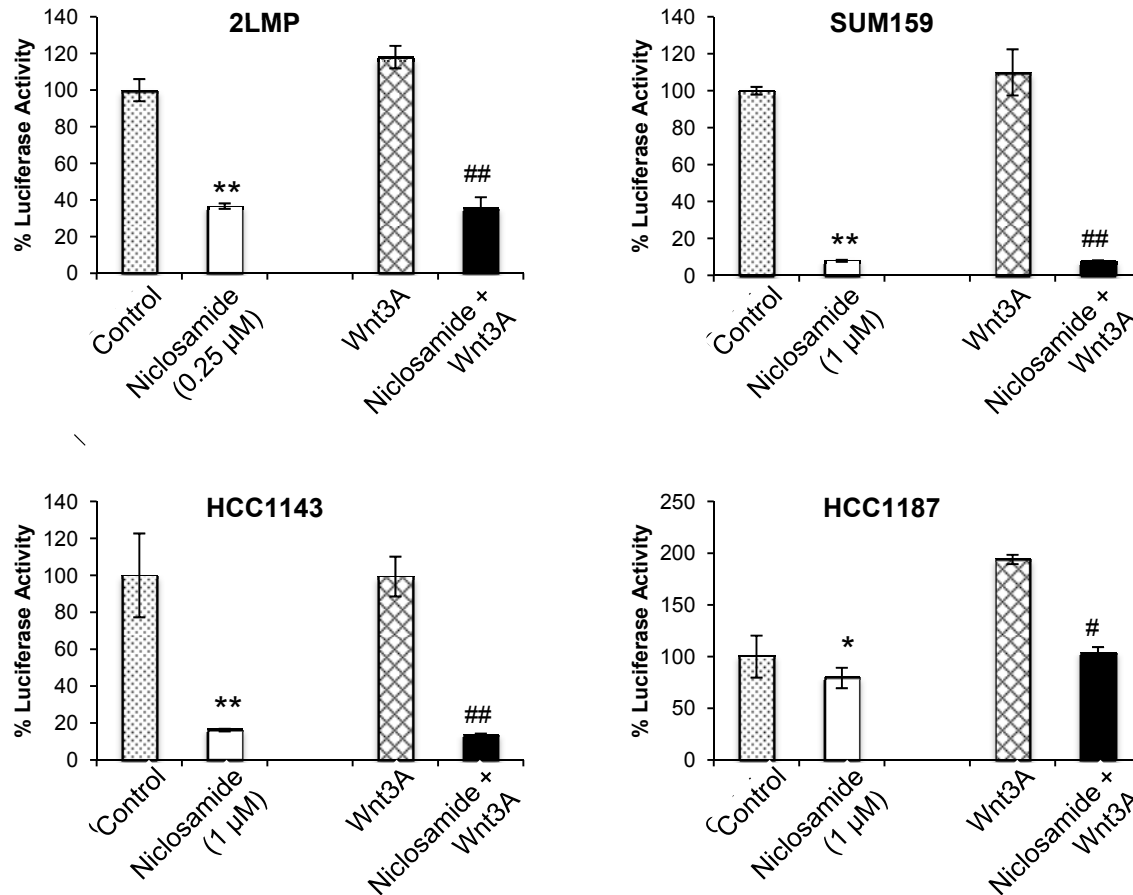

**Supplementary Figure S2. Niclosamide effect on Wnt/ $\beta$ -catenin signaling.** Activity of TCF/LEF plasmid reporter in the TOPflash assay was evaluated on adherent 2LMP, SUM159, HCC143 and HCC1187 cells. Cell lines were treated with 1  $\mu$ M niclosamide for 24 hours (SUM159, HCC1143 and HCC1187) or with 0.25  $\mu$ M niclosamide (2LMP). Each cell line was also treated with Wnt3A ligand (5 ng/mL) alone and in combination with niclosamide. The experiment was performed in triplicate. The bars represent means  $\pm$  SE. Treatment was compared to control or Wnt3A. Niclosamide vs. control (\* $P$  < 0.05); niclosamide vs. control (\*\* $P$  < 0.01); niclosamide vs. Wnt3A (# $P$  < 0.05); niclosamide + Wnt3A vs. Wnt3A (## $P$  < 0.01).
