# Supplementary material for: Effect of Niclosamide on Basal-like Breast Cancers
Source: Oxford University Press journal article supplement (doi:10.1158/1535-7163.mct-13-0555), 2014-02-20
Supplement: 15357163mct130555-sup-fig4.pdf [file 15357163mct130555-sup-fig4.pdf]

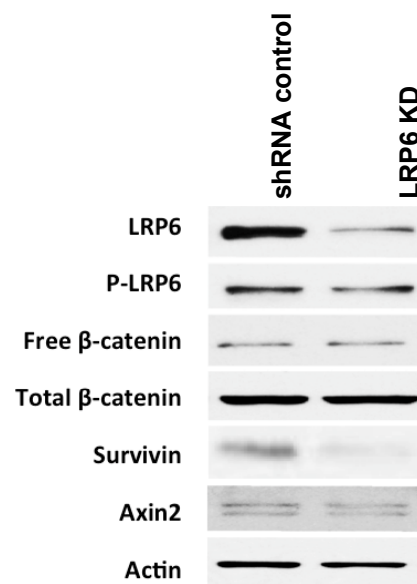

**Supplementary Figure S4. Wnt/β-catenin signaling proteins in LRP6 KD cells.** Western blot for expression of Wnt/β-catenin signaling proteins in adherent 2LMP shRNA LRP6 knockdown cells compared to shRNA control cells.
