# Supplementary material for: Effect of Niclosamide on Basal-like Breast Cancers
Source: Oxford University Press journal article supplement (doi:10.1158/1535-7163.mct-13-0555), 2014-02-20
Supplement: 15357163mct130555-sup-fig5.pdf [file 15357163mct130555-sup-fig5.pdf]

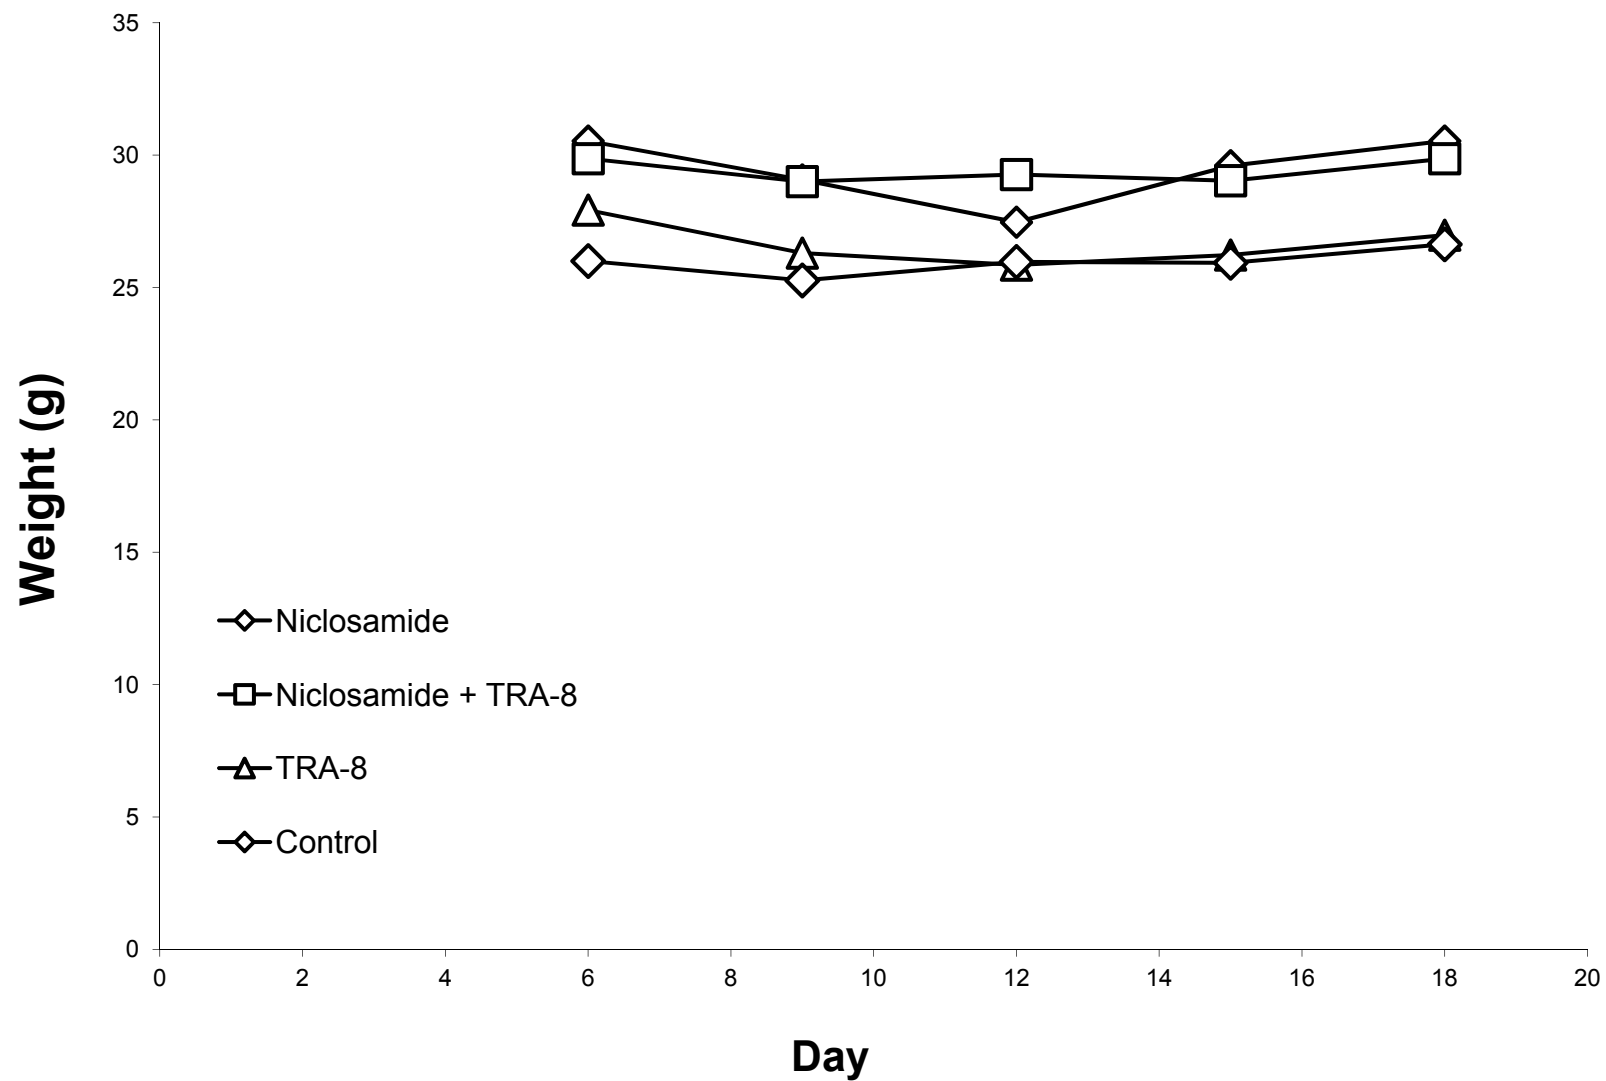

**Supplementary Figure S5. *In vivo* toxicity study.** Athymic nude mice were treated with niclosamide (20 mg/kg), TRA-8 (200 ng) or the combination for two weeks. Mice were weighed twice a week for two weeks.
