# Supplementary material for: Effect of Niclosamide on Basal-like Breast Cancers
Source: Oxford University Press journal article supplement (doi:10.1158/1535-7163.mct-13-0555), 2014-02-20
Supplement: 15357163mct130555-sup-tab1.pdf [file 15357163mct130555-sup-tab1.pdf]

## Supplementary Table S1

**Supplementary Table S1. Sensitivity of BLBC cell lines to niclosamide mediated cytotoxicity.** SUM159, HCC1187, HCC1143 and 2LMP BLBC NAAE and adherent cell lines were treated with niclosamide for 48 hours and analyzed for viability using the ATPlite assay. Individual experiments were assayed in quadruplicate and values represent the mean and SD of three independent experiments. SUM159  $P < 0.05$ , HCC1187  $P < 0.05$ , HCC1143  $P < 0.0005$ , 2LMP  $P > 0.05$ .

| Cell Line | NAAE<br>IC <sub>50</sub> $\mu$ M | Adherent<br>IC <sub>50</sub> $\mu$ M |
|-----------|----------------------------------|--------------------------------------|
| SUM159    | 0.18 ( $\pm$ 0.09)               | 0.33 ( $\pm$ 0.04)                   |
| HCC1187   | 0.18 ( $\pm$ 0.06)               | 1.9 ( $\pm$ 1.15)                    |
| HCC1143   | 0.17 ( $\pm$ 0.09)               | 1.1 ( $\pm$ 0.12)                    |
| 2LMP      | 0.29 ( $\pm$ 0.19)               | 0.44 ( $\pm$ 0.29)                   |
