# Supplementary material for: Effect of Niclosamide on Basal-like Breast Cancers
Source: Oxford University Press journal article supplement (doi:10.1158/1535-7163.mct-13-0555), 2014-02-20
Supplement: 15357163mct130555-sup-tab2.pdf [file 15357163mct130555-sup-tab2.pdf]

## Supplementary Table S2

**Supplementary Table S2.** Immunohistochemistry of mouse tumors treated for two weeks with vehicle control, niclosamide (20 mg/kg), TRA-8 (200  $\mu$ g) or the combination of both agents. Tumors were stained and analyzed (H-score) for p-STAT3, cytosolic  $\beta$ -catenin, nuclear  $\beta$ -catenin and cleaved caspase 3. The values represent an average of three tumors per group ( $\pm$  SE).

|                                      | p-STAT3          | $\beta$ -Catenin<br>(cytoplasm) | $\beta$ -Catenin<br>(nucleus) | Cleaved caspase-<br>3 |
|--------------------------------------|------------------|---------------------------------|-------------------------------|-----------------------|
| <b>Vehicle Control</b>               | 55.0 ( $\pm$ 28) | 76.7 ( $\pm$ 37)                | 20.0 ( $\pm$ 12)              | 45.0 ( $\pm$ 38)      |
| <b>Niclosamide (20 mg/kg)</b>        | 0.0 ( $\pm$ 0)   | 53.3 ( $\pm$ 13)                | 6.7 ( $\pm$ 7)                | 40.0 ( $\pm$ 30)      |
| <b>TRA-8 (200 <math>\mu</math>g)</b> | 13.3 ( $\pm$ 7)  | 50.0 ( $\pm$ 21)                | 0.0 ( $\pm$ 0)                | 76.7 ( $\pm$ 38)      |
| <b>Niclosamide and TRA-8</b>         | 0.0 ( $\pm$ 0)   | 23.3 ( $\pm$ 13)                | 6.7 ( $\pm$ 3)                | 85.0 ( $\pm$ 43)      |
